# Supplementary material for: Lanthanide directed self-assembly formations of Tb(iii) and Eu(iii) luminescent complexes from tryptophan based pyridyl amide ligands
Source: Royal Society of Chemistry journal article supplement (doi:10.1039/c1cc11326g), 2011-01-01

# Lanthanide directed self-assembly formations of Tb(III) and Eu(III) luminescent complexes from tryptophan based pyridyl amide ligands

Christophe Lincheneau, Joseph P. Leonard, Thomas McCabe and Thorfinnur Gunnlaugsson\*

## Electronic Supporting Information

### Characterisation of 1:

HRMS: Calculated for  $C_{31}H_{29}N_5O_6Na$ :  $[L+Na]^+$   $m/z = 590.2016$ ; Found: 590.2019.  $\delta_H$  (400 MHz, MeOD- $D_4$ ): 8.22 (d,  $J = 5.54$  Hz, 2H, Pyr-H), 8.12 (t,  $J = 5.52$  Hz, 1H, Pyr-H), 7.56 (d,  $J = 5.28$  Hz, 2H, Tryp-H), 7.32 (d,  $J = 5.52$  Hz, 2H, Tryp-H), 7.07 (t,  $J = 4.76$  Hz, 2H, Tryp-H), 7.02 (s, 2H, Tryp-H), 6.98 (t,  $J = 4.76$  Hz, 2H, Tryp-H), 5.00 (t,  $J = 3.72$  Hz, 2H, -CH), 3.77 (s, 6H, -CH<sub>3</sub>), 3.52 (d,  $J = 3.48$  Hz, 4H, -CH<sub>2</sub>)  $\delta_c$  (100 MHz, MeOD- $D_4$ ): 172.7, 164.4, 148.9, 139.5, 137.1, 127.6, 125.3, 123.6, 121.6 118.9, 118.2, 111.4, 109.7, 54.1, 51.9, 27.5. IR  $\nu_{max}$ : 3329.2, 1752.9, 1731.9, 1686.2, 1661.6, 1523.0, 1458.6, 1437.4, 1349.3, 1214.0, 1190.9, 1168.3, 1106.8, 1000.4, 925.7, 843.8, 752.7, 739.8, 683.7.

### Characterisation of 2:

HRMS: Calculated for  $C_{31}H_{29}N_5O_6Na$ :  $[L+Na]^+$   $m/z = 590.2016$ ; Found: 590.2021.  $\delta_H$  (400 MHz, MeOD- $D_4$ ): 8.23 (d,  $J = 5.52$  Hz, 2H, Pyr-H), 8.12 (t,  $J = 5.52$  Hz 1H, Pyr-H), 7.55 (d,  $J = 5.28$  Hz, 2H, Tryp-H), 7.32 (d,  $J = 5.52$  Hz, 2H, Tryp-H), 7.07 (t,  $J = 4.48$  Hz, 2H, Tryp-H), 7.02 (s, 2H, Tryp-H), 6.96 (t,  $J = 4.48$  Hz, 2H, Tryp-H), 5.01 (t,  $J = 3.52$  Hz, 2H, -CH), 3.77 (s, 6H, -CH<sub>3</sub>), 3.52 (d,  $J = 3.48$  Hz, 4H, -CH<sub>2</sub>)  $\delta_c$  (100 MHz, MeOD- $D_4$ ): 172.8, 164.5, 148.9, 139.5, 137.1, 127.6, 125.3, 123.7, 121.6 118.9, 118.2, 111.4, 109.7, 54.1, 52.0, 27.5. IR  $\nu_{max}$ : 3330.2, 1753.3, 1731.9, 1686.6, 1661.6, 1523.8, 1458.7, 1437.9, 1357.3, 1214.3, 1191.2, 1166.6, 1073.4, 1000.6, 925.2, 844.0, 780.9, 752.9, 739.8.

### General procedure for the synthesis of the complexes **L<sub>3</sub>.Tb**:

Ligands **1** or **2** (3 equivalents) and Tb(CF<sub>3</sub>SO<sub>3</sub>)<sub>3</sub> (1.1 equivalents) were refluxed for 12 hours in acetonitrile. The resulting mixture was poured onto diethyl ether and the resulting white solids isolated by filtration under reduced pressure. The resulting complexes were recrystallised from methanol.

### Complex formed of **1** with Tb(III)

The synthesis of **1<sub>2</sub>.Tb** was performed following the general procedure with ligand **1** (31.7 mg, 0.056 mmol) and Tb(CF<sub>3</sub>SO<sub>3</sub>)<sub>3</sub> (12.4 mg, 0.020 mmol). The resulting complex was obtained (25.4 mg, 0.011 mmol) in 72 % yield. Calculated for C<sub>64</sub>H<sub>58</sub>F<sub>6</sub>N<sub>10</sub>O<sub>18</sub>S<sub>2</sub>Tb: [L<sub>2</sub>.Tb + 2× CF<sub>3</sub>SO<sub>3</sub>]<sup>+</sup> *m/z* = 1591.2529; Found: 1591.2505. δ<sub>H</sub> (400 MHz, MeOD-D<sub>4</sub>) 33.2, 30.9, 26.8, 25.0, 11.6, 10.2, 9.5, 8.2, 7.6, 7.3, 7.0, 4.9, 3.7, 3.5, 3.3, 1.4, -10.4, -15.6. IR ν<sub>max</sub>: 3333.3, 2947.2, 1732.6, 1662.1, 1522.8, 1438.1, 1349.7, 1216.0, 1168.6, 1105.5, 1073.8, 1029.8, 1008.3, 844.1, 752.13, 740.3, 685.2.

### Complex formed from **2** with Tb(III)

The synthesis of **2<sub>2</sub>.Eu** was performed following the general procedure with ligand **4** (17.1 mg, 0.03 mmol) and Tb(CF<sub>3</sub>SO<sub>3</sub>)<sub>3</sub> (6.7 mg, 0.01 mmol). The resulting complex was obtained (15.7 mg, 0.007 mmol) in 90%. Calculated for C<sub>64</sub>H<sub>58</sub>F<sub>6</sub>N<sub>10</sub>O<sub>18</sub>S<sub>2</sub>Tb: [L<sub>2</sub>.Tb + 2× CF<sub>3</sub>SO<sub>3</sub>]<sup>+</sup> *m/z* = 1591.2529; Found: 1591.2590. δ<sub>H</sub> (400 MHz, MeOD-D<sub>4</sub>) 33.3, 31.1, 26.8, 25.0, 11.7, 10.2, 9.5, 8.2, 8.1, 7.6, 7.3, 7.1, 6.9, 4.9, 3.8, 3.5, 3.3, 2.2, 1.3, 0.9, -10.5, -15.6. IR ν<sub>max</sub>: 3327.3, 2949.9, 2445.0, 1732.6, 1662.0, 1521.8, 1438.3, 1342.6, 1235.4, 1169.8, 1105.4, 1074.5, 1029.7, 1001.4, 917.0, 843.6, 751.5, 739.3, 688.2.

Figure S1  $^1\text{H}$  and  $^{13}\text{C}$  NMR of **1**

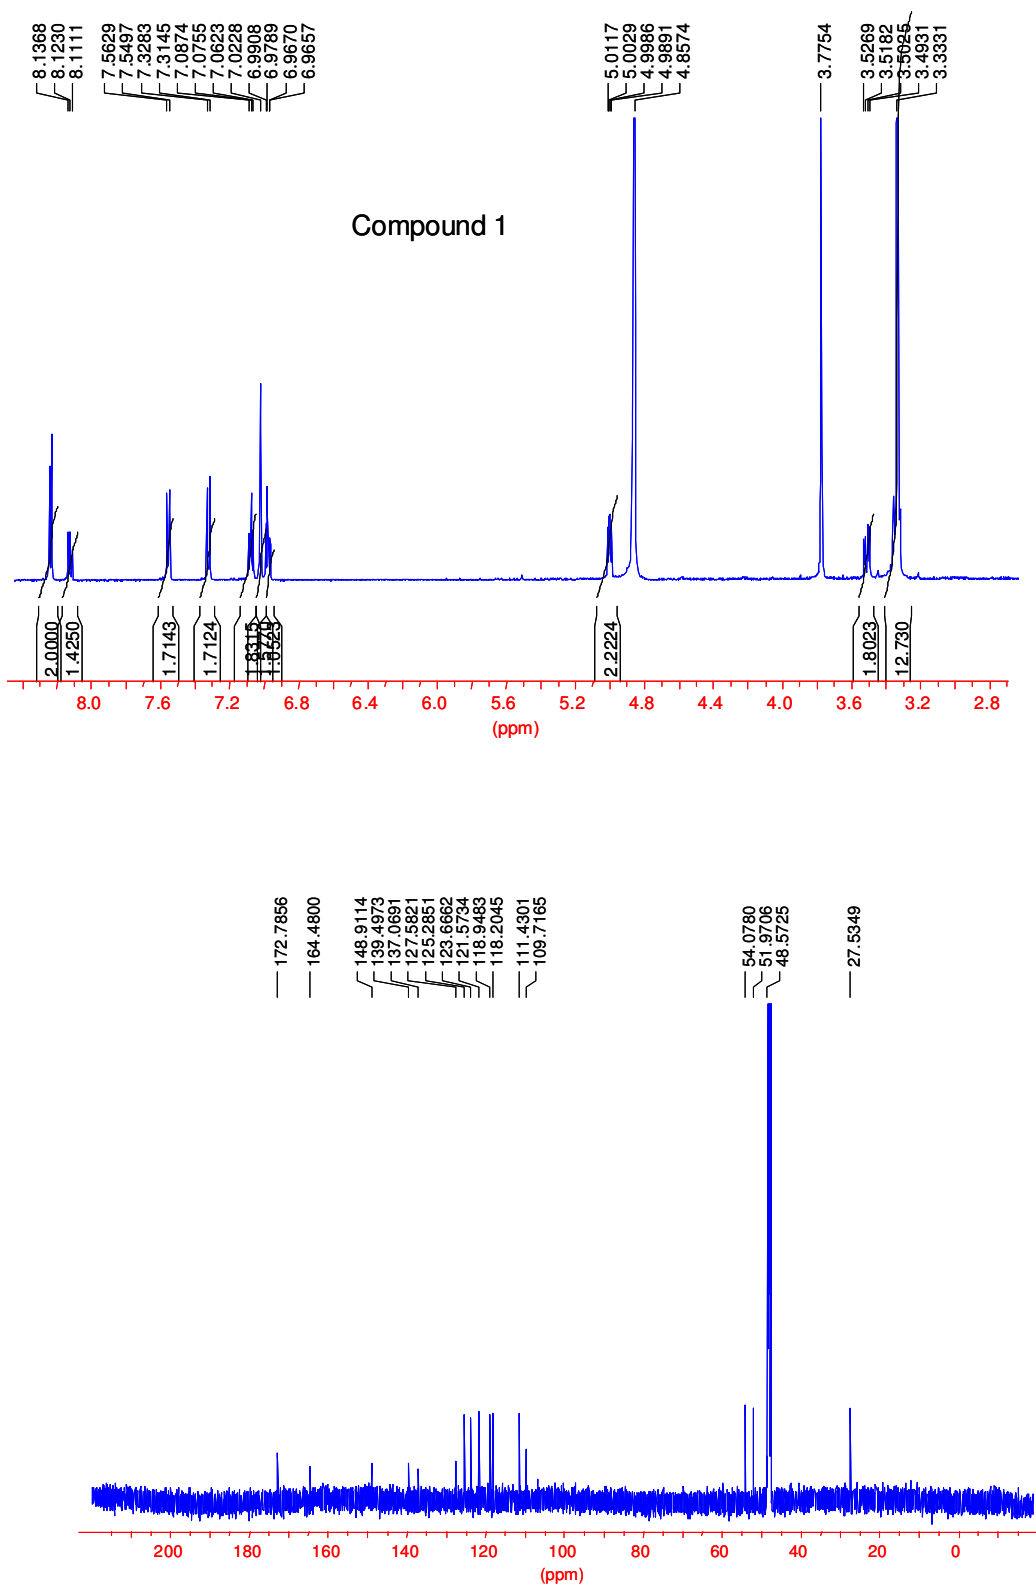

Figure S2  $^1\text{H}$  and  $^{13}\text{C}$  NMR of **2**

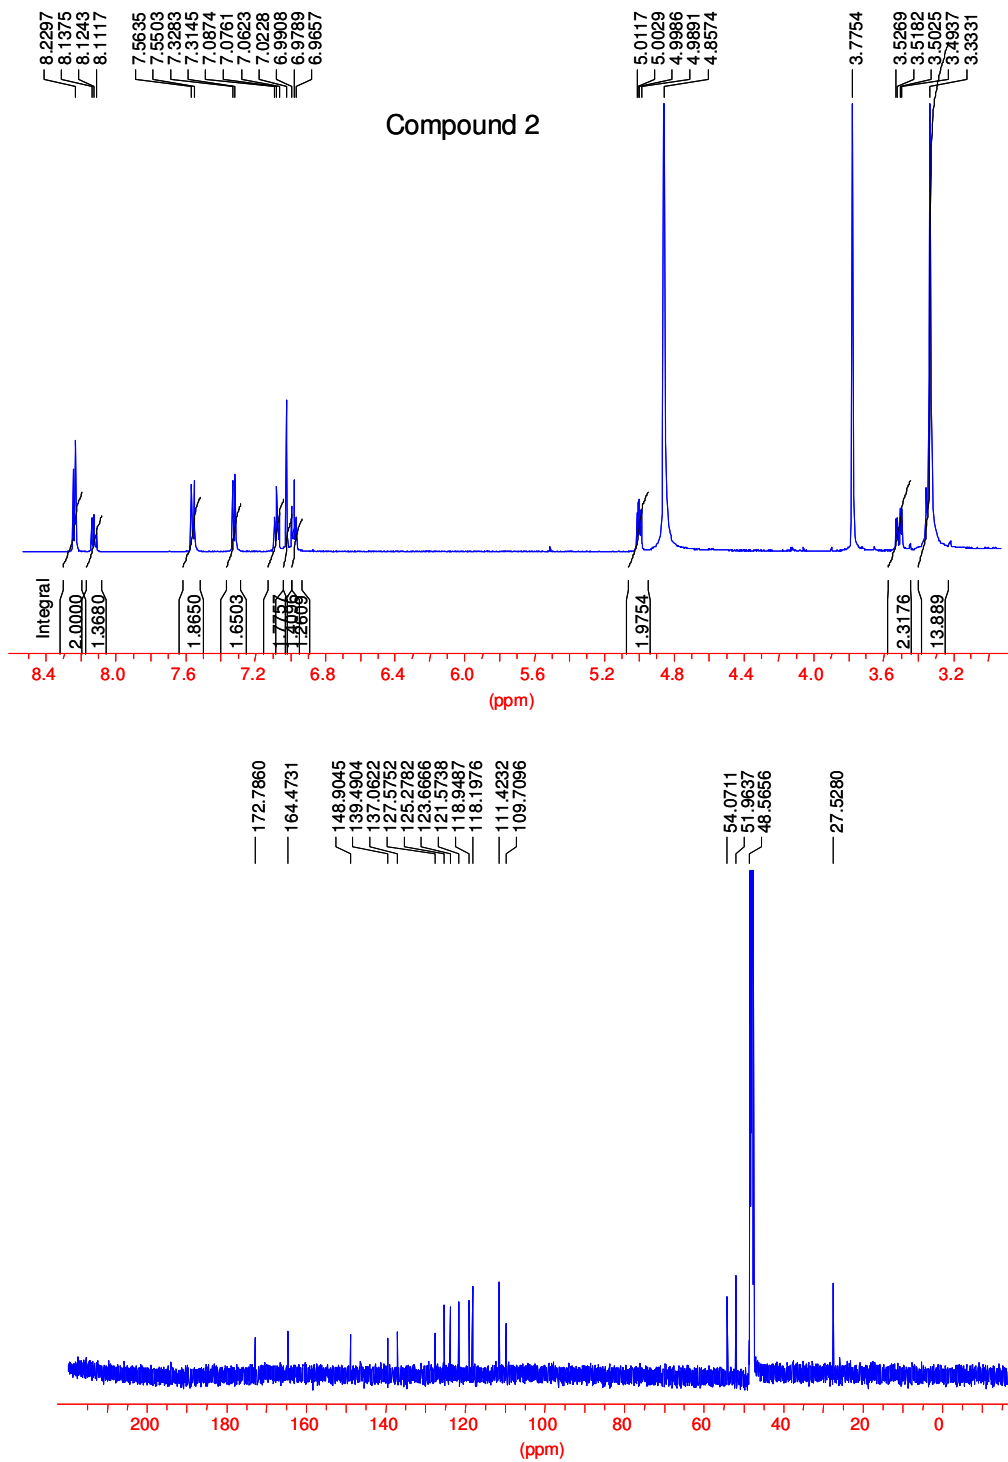

Figure S3  $^1\text{H}$  of  $1_2\text{Tb}$

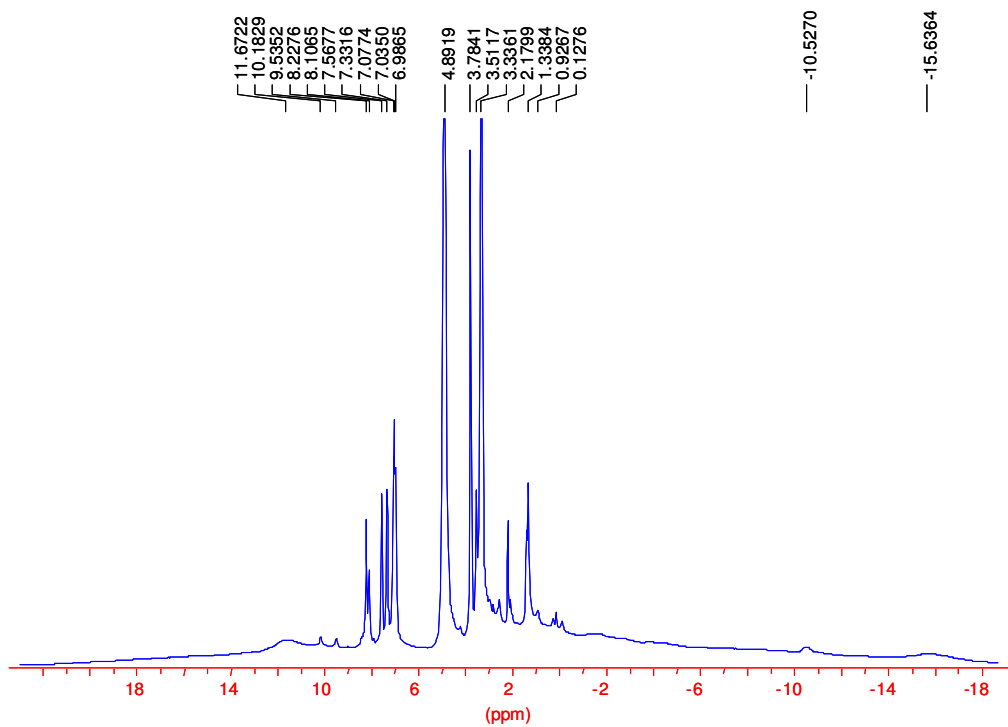

Figure S3  $^1\text{H}$  of  $2_2\text{Tb}$

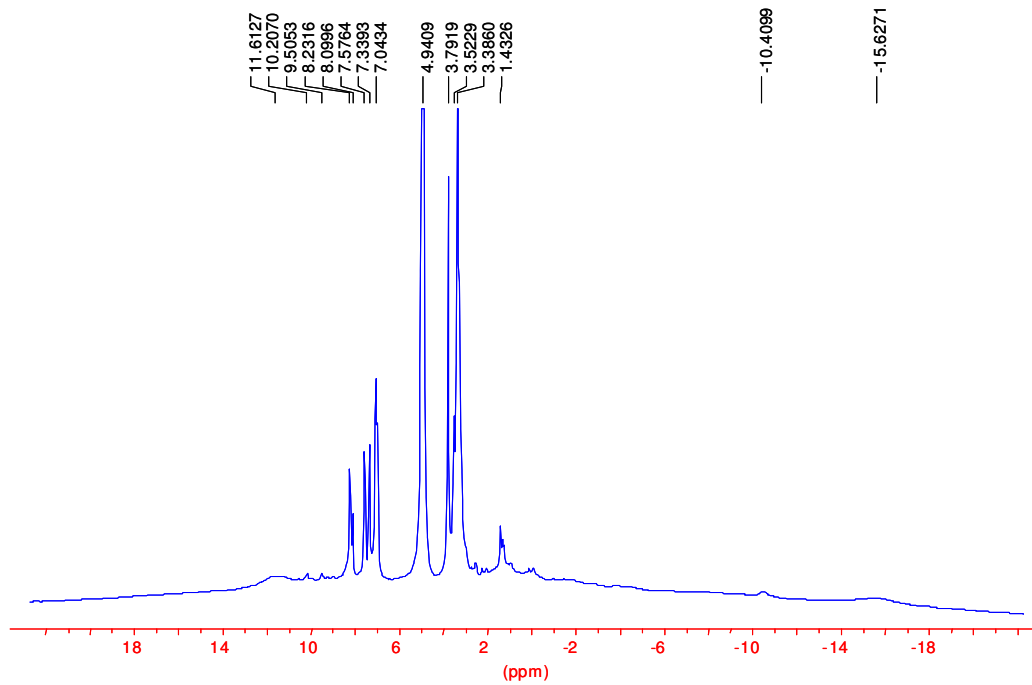

**Figure S5** CD- spectra of **1** and **2**

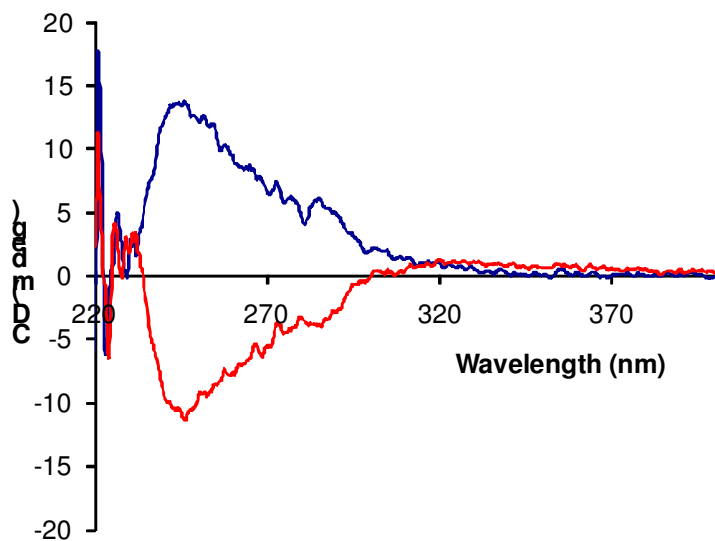

**Figure S6** CD-Spectra of **1<sub>2</sub>Tb** and **2<sub>2</sub>Tb**

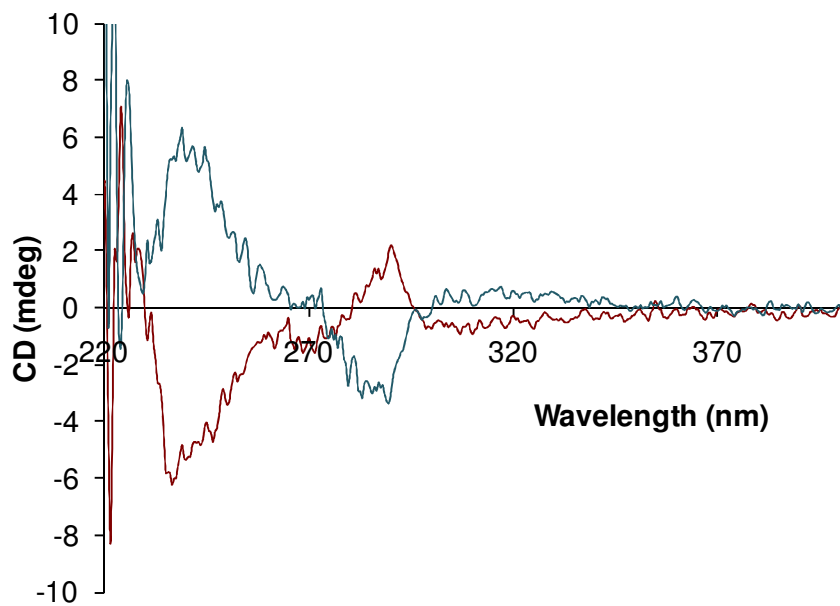

**Figure S7 MS of  $2_2\text{Tb}$**

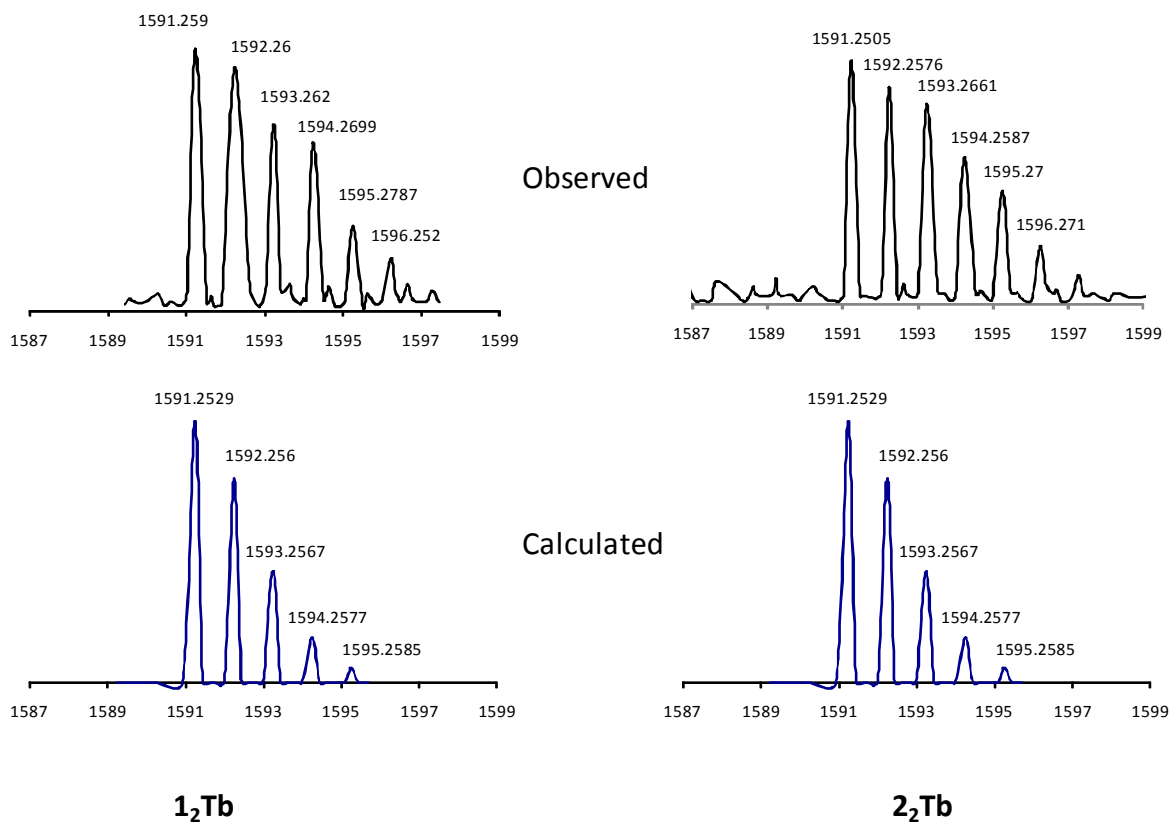

**Figure S8 Tb(III) emission from  $2_2\text{Tb}$**

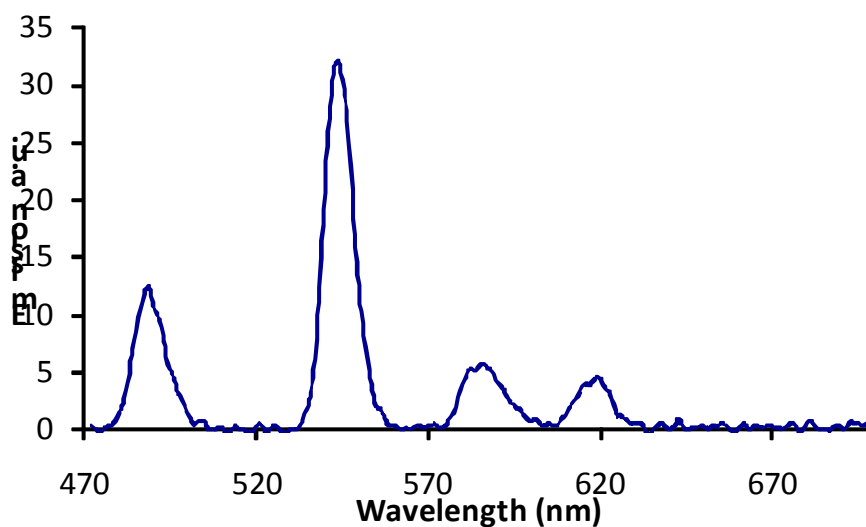

**Figure 9** Changes in the fluorescence emission of **1** upon addition of 0 and 05. equivalents of Tb(III)

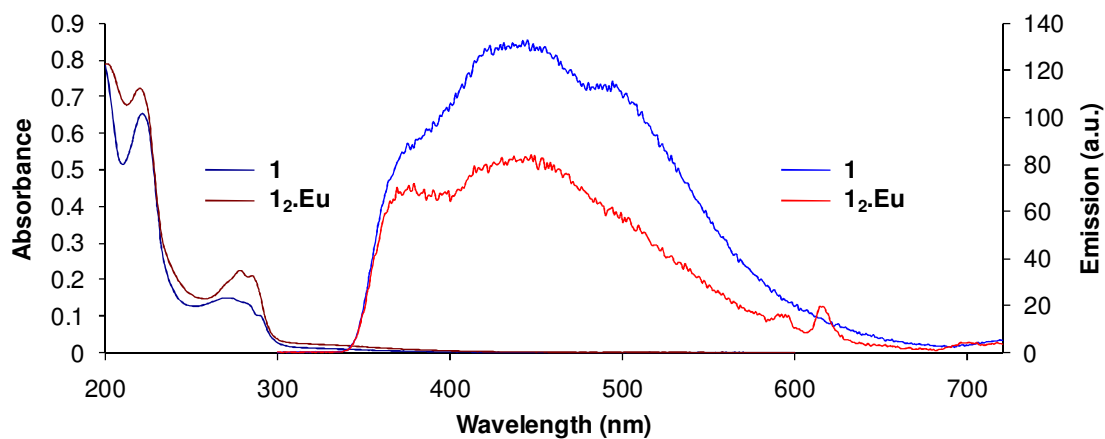

**Figure 10** The speciation distribution diagram for the formation of **2<sub>2</sub>Tb** from **2**

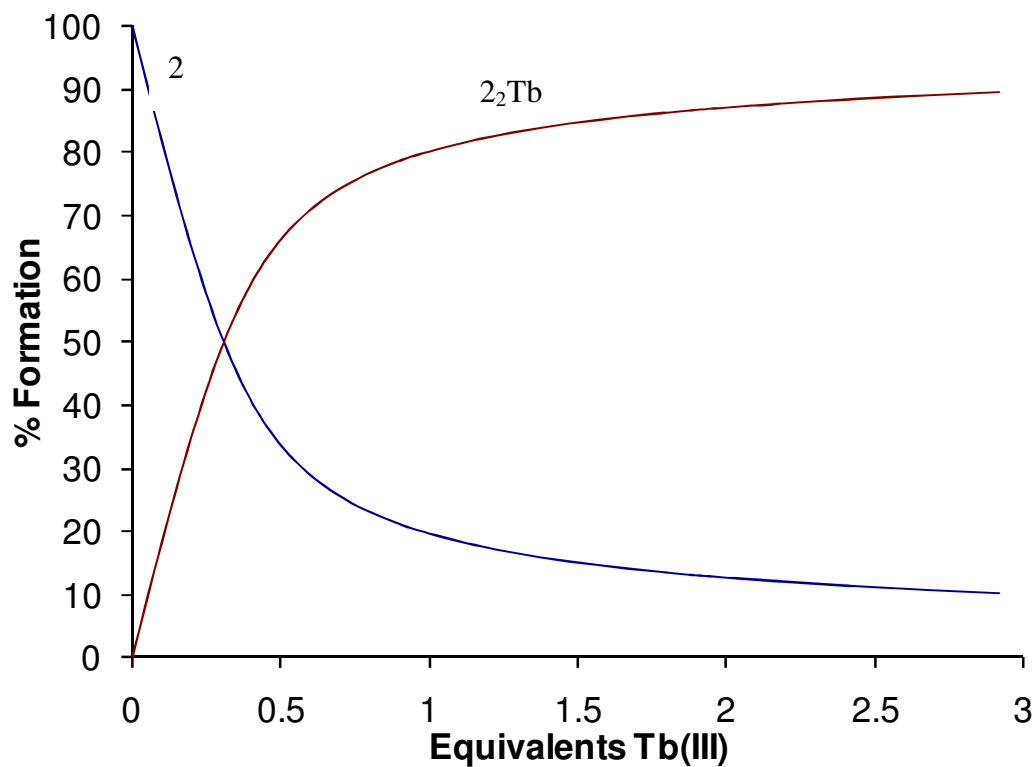



Figure 11 The speciation distribution diagram for the formation of  $1_2\text{Eu}$  from **1**

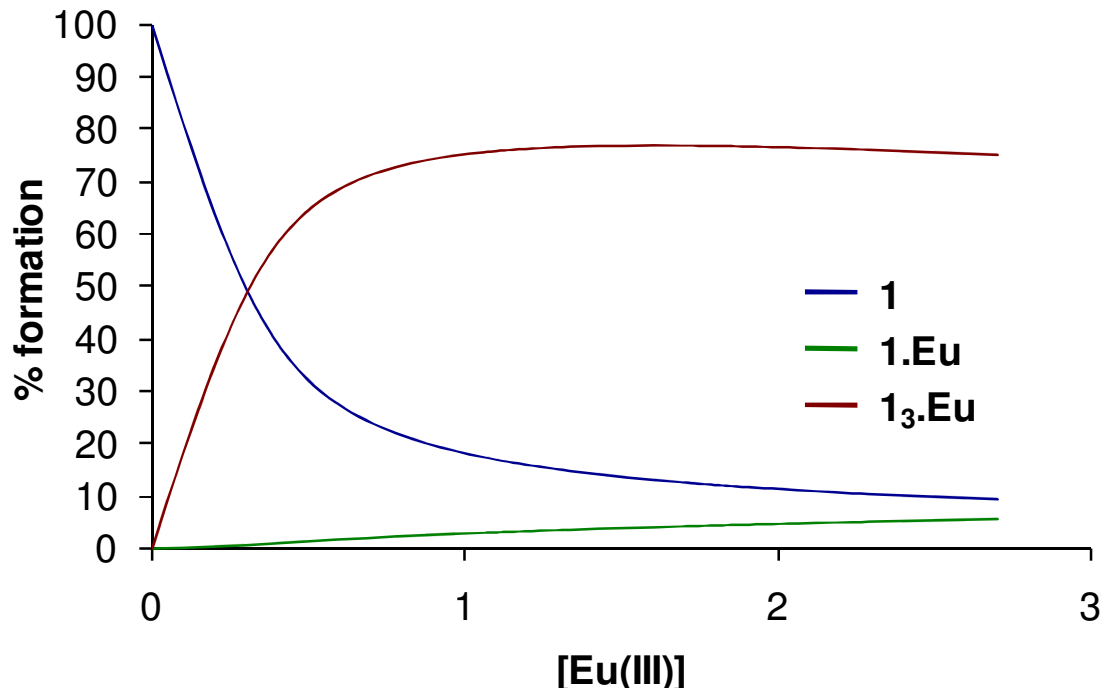

Supplement: c1cc11326g.pdf [file c1cc11326g.pdf]
